# Supplementary material
Source: publisher figshare collection journal article supplement (https://acs.figshare.com/ndownloader/files/4209415)
Supplement: Supplementary file 1 [file 4209415]

## Supporting Information

# TiO<sub>2</sub> nanorod-templated synthesis of upstanding hexagonal kassite nanosheet arrays: An intermediate route to novel nanoporous TiO<sub>2</sub> nanosheet arrays

*Xiaoyan Gan<sup>a\*</sup>, Xiaomin Li<sup>a</sup>, Xiangdong Gao<sup>a</sup>, Jijun Qiu<sup>a</sup>, Xiudi Xiao<sup>b</sup>*

<sup>a</sup> State Key Laboratory of High Performance Ceramics and Superfine Microstructures, Shanghai Institute of Ceramics, Chinese Academy of Sciences, 1295 Ding Xi Road, Shanghai, 200050, P.R. China

<sup>b</sup> Key Laboratory of Renewable Energy and Gas Hydrates, Guangzhou Institute of Energy Conversion, Chinese Academy of Sciences, Guangzhou, 510640, P.R. China

\* Address correspondence to: ganxiaoyan@mail.sic.ac.cn

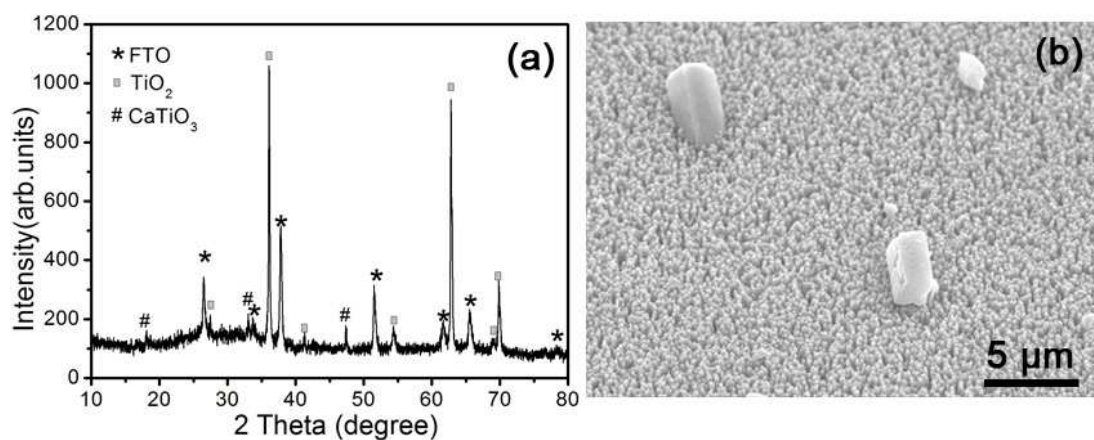

**Figure S1.** XRD pattern(a) and SEM image (b) of the sample obtained by treating the  $\text{TiO}_2$  nanorod arrays in 10M KOH at 150°C for 5h.

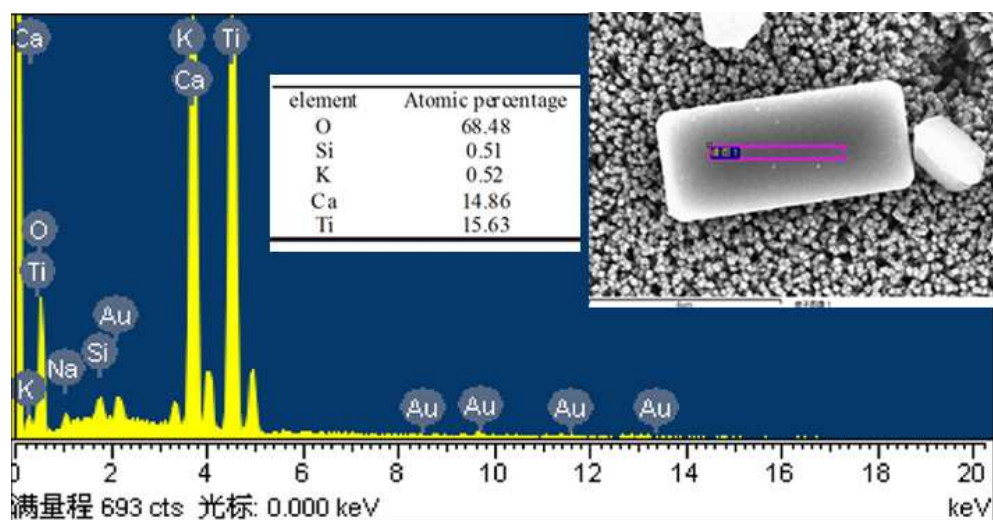

**Figure S2.** EDS spectrum of the sample obtained by treating the  $\text{TiO}_2$  nanorod arrays in 10M KOH at 150°C for 5h. The left insert shows the atomic percentage of the prism in the area indicated in the right insert.
